# Supplementary material for: FBW7 couples structural integrity with functional output of primary cilia
Source: PubMed Central journal article supplement (PMC8438042; doi:10.1038/s42003-021-02504-4), 2021-09-13
Supplement: 42003_2021_2504_MOESM2_ESM.pdf [file 42003_2021_2504_MOESM2_ESM.pdf]

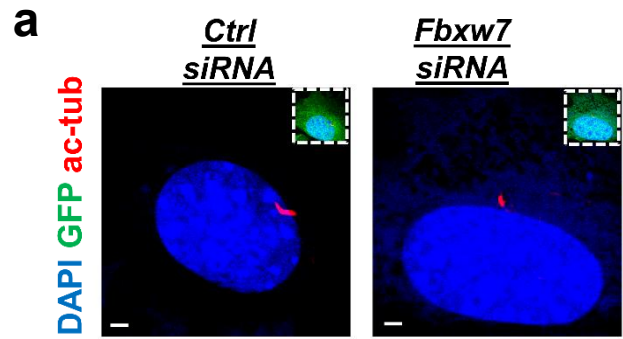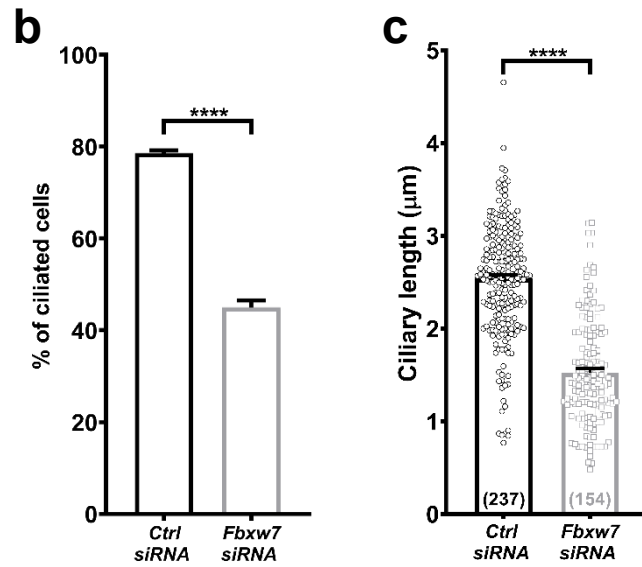

**Supplementary Figure 1. Downregulation of *Fbxw7* reduces cilium incidence in C3H10T1/2 cells.**

**a)** Representative images of C3H10T1/2 cells transfected with GFP and the indicated constructs, and serum starved for 24h. Scale bars: 2 μm.

**b,c)** Percent of ciliated cells (**b**) (n=3 experiments) and ciliary length (**c**) of cells in (**a**). For ciliary length analysis, the number of cells analyzed is indicated at the bottom of each bar in (**c**). Data are presented as means ± SEM. Student's t-test, \*\*\*\*p < 0.0001.

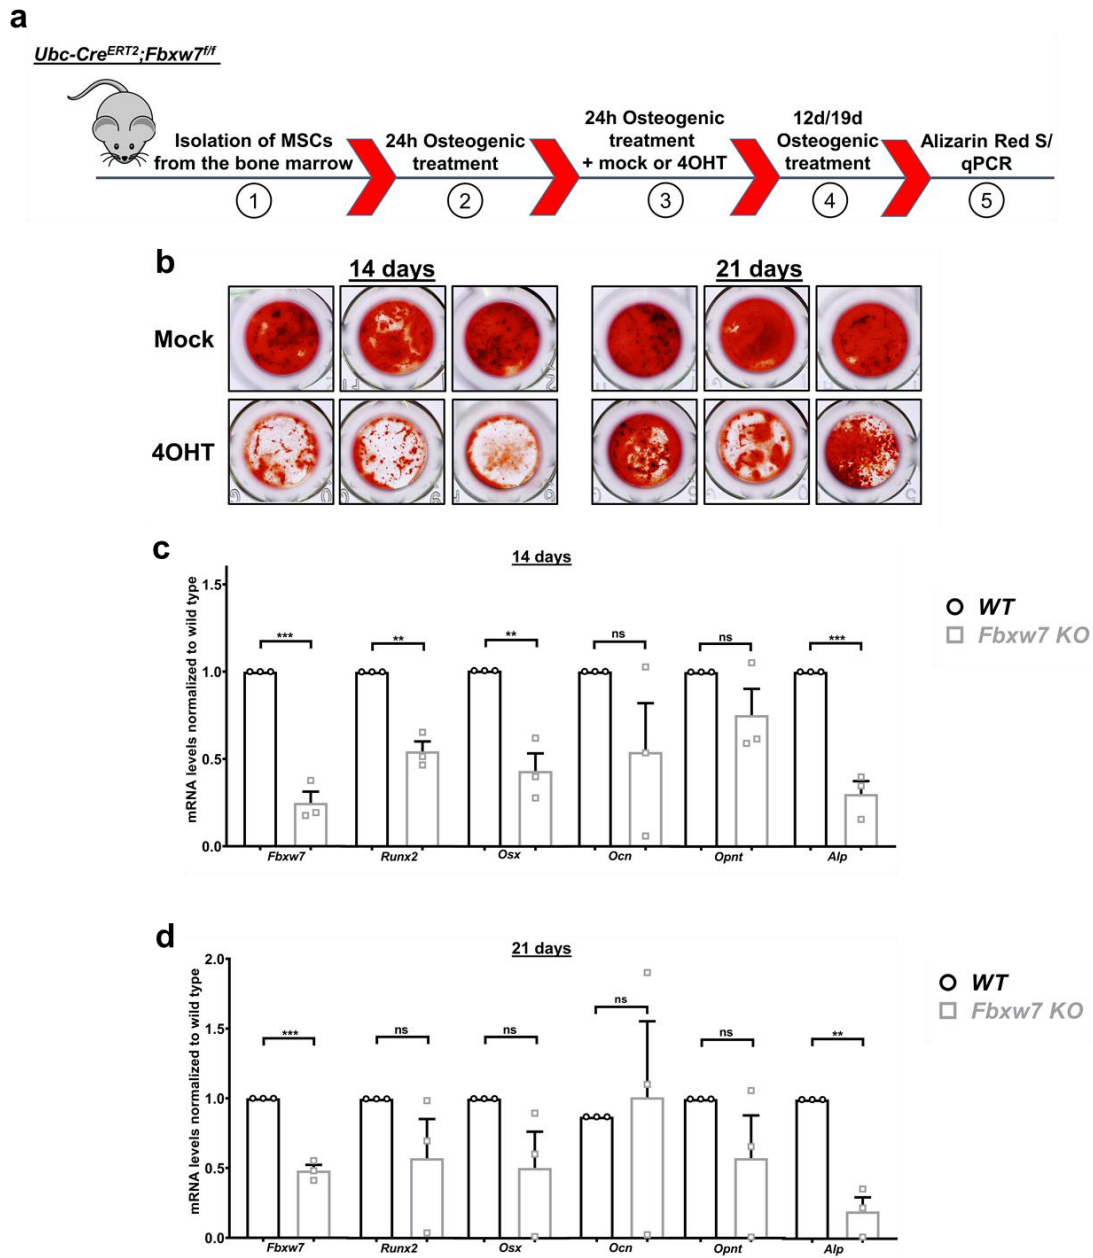

**Supplementary Figure 2. *Fbxw7* deletion after osteogenic induction mildly suppresses differentiation of *UbcCre<sup>ERT2</sup>; Fbxw7<sup>fl/fl</sup>* MSCs to osteoblasts.**

**a)** Diagram showing experimental setup for ex vivo deletion of *Fbxw7*. Isolation of MSCs from the bone marrow of *UbcCre<sup>ERT2</sup>; Fbxw7<sup>fl/fl</sup>* mice (1) was followed by 24h osteogenic treatment (2), 24h 4OHT-induced deletion of *Fbxw7* (3), continuation of osteogenic treatment (4) and analysis of osteoblast differentiation (5).

**b-d)** Osteoblast differentiation of *UbcCre<sup>ERT2</sup>; Fbxw7<sup>fl/fl</sup>*-derived MSCs treated with mock or 4OHT after initial osteogenic induction (n=3 different mice). Differentiation was measured at 14 and 21 days after osteogenic induction via Alizarin Red S staining (b) and mRNA levels of osteoblast differentiation markers *Runx2*, *Osterix (Osx)*, *Osteocalcin (Ocn)*, *Osteopontin (Opnt)* and Alkaline phosphatase (*Alp*) at 14 (c) and 21 days (d). mRNA levels of *Fbxw7* were analyzed to confirm deletion of the gene. Data are presented as means  $\pm$  SEM. Student's t-test, \*\*p < 0.01, \*\*\*p < 0.001, \*\*\*\*p < 0.0001. Images were taken from 96-well plates (a). Well diameter: 5 mm.

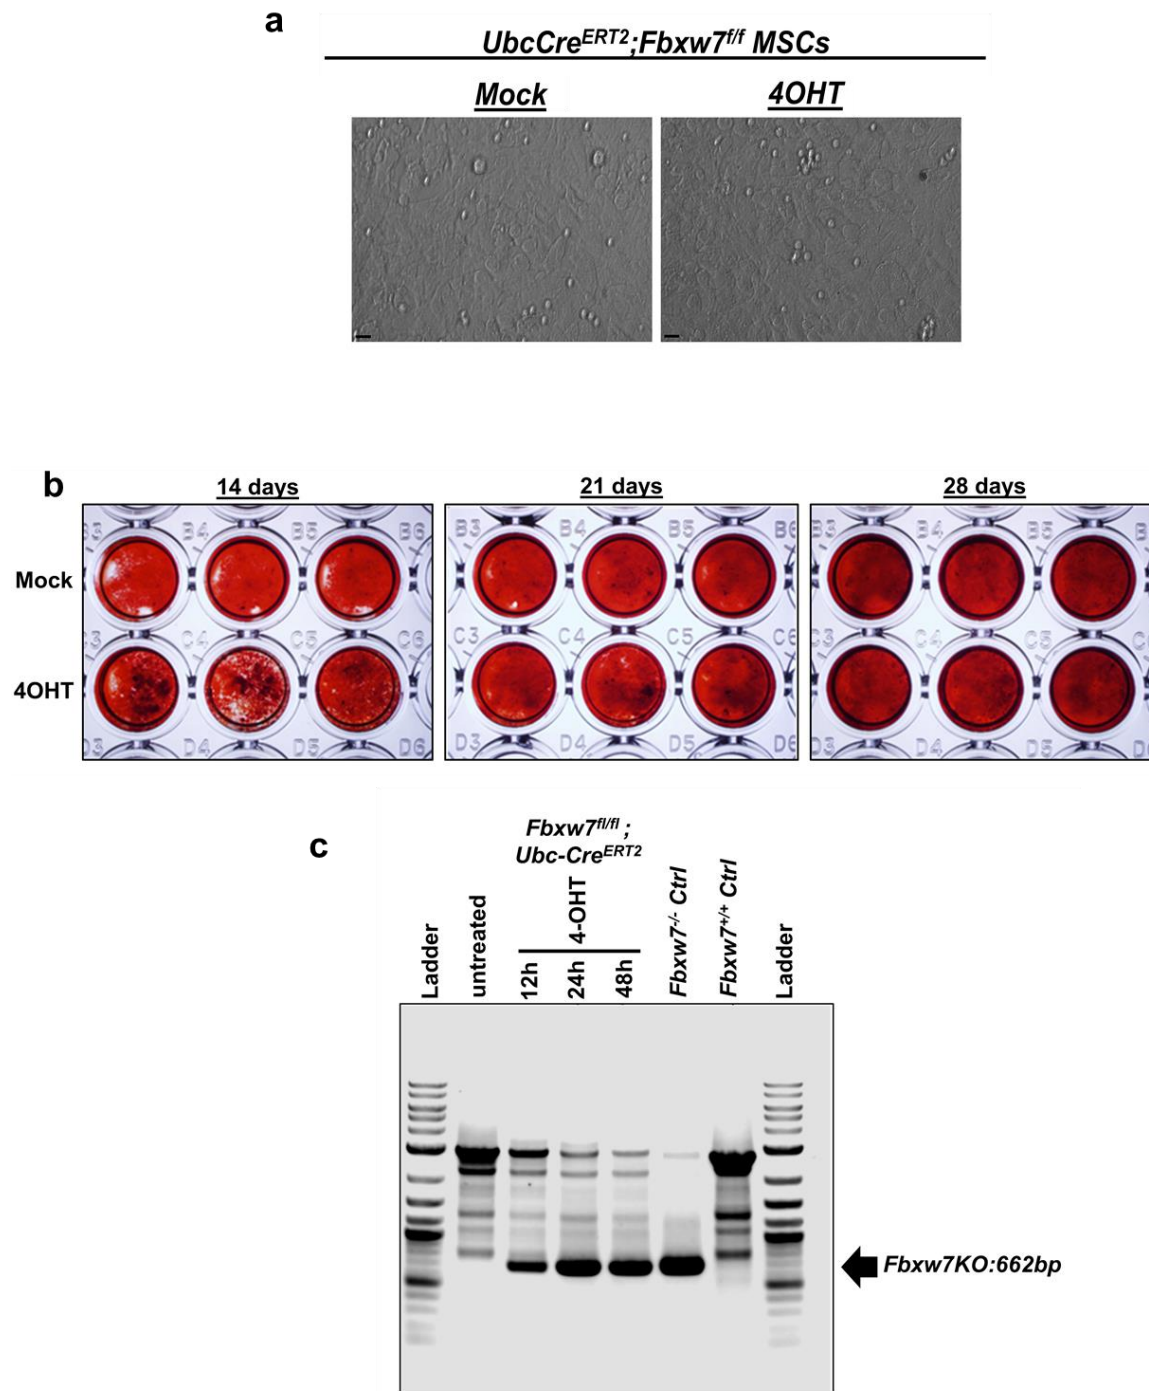

**Supplementary Figure 3. No effect of 4OHT in osteoblast differentiation of wild type MSCs.**

**a)** Representative DIC image of mock- or 4OHT- treated *UbcCre<sup>ERT2</sup>; Fbxw7<sup>fl/fl</sup>* MSCs before the onset of differentiation induction. Scale bars: 15  $\mu$ m.

**b)** Osteoblast differentiation of *Fbxw7<sup>fl/fl</sup>*-derived MSCs treated with DMSO (mock) or 4OHT. Differentiation was measured at 14, 21 and 28 days via Alizarin Red S staining. Images were taken from 96-well plates: Well diameter: 5 mm.

**c)** Confirmation of deletion of *Fbxw7* in MSCs of *UbcCre<sup>ERT2</sup>; Fbxw7<sup>fl/fl</sup>* after various duration of treatment with 4OHT. Black arrow indicates the PCR product after disruption of *Fbxw7*.

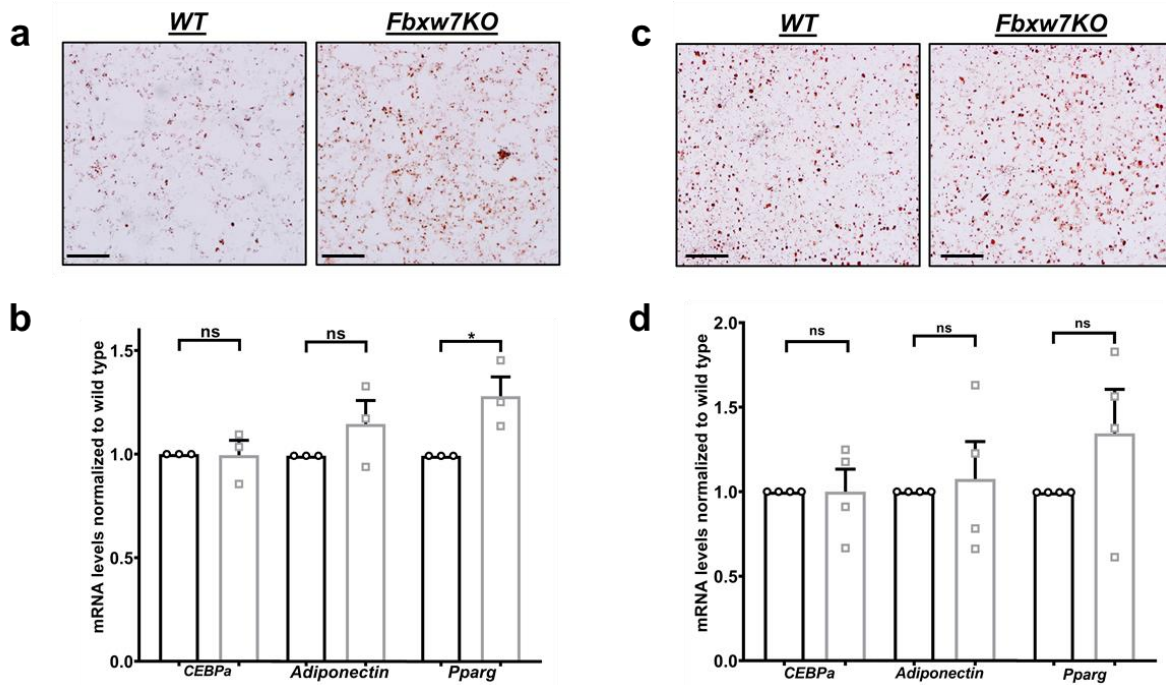

**Supplementary Figure 4. Deletion of *Fbxw7* before adipogenic induction increases adipogenesis in *UbcCre<sup>ERT2</sup>; Fbxw7<sup>fl/fl</sup>* MSCs.**

**a-d)** Adipogenic differentiation of *UbcCre<sup>ERT2</sup>; Fbxw7<sup>fl/fl</sup>*-derived MSCs treated with mock or 4OHT before (a,b) (n=3 different mice) or after initial adipogenic induction (c,d) (n=4 different mice). Differentiation was measured via Oil red O staining (a,c) and mRNA levels of adipogenic differentiation markers *CEBPa*, *Adiponectin* and *Pparg* (b,d). Data are presented as means  $\pm$  SEM. Student's t-test, \*p < 0.05, \*\*p < 0.01, \*\*\*\*p < 0.0001. Images were taken from a 96-well plate using 6.3x magnification (a). Scale bar: 500  $\mu$ m.

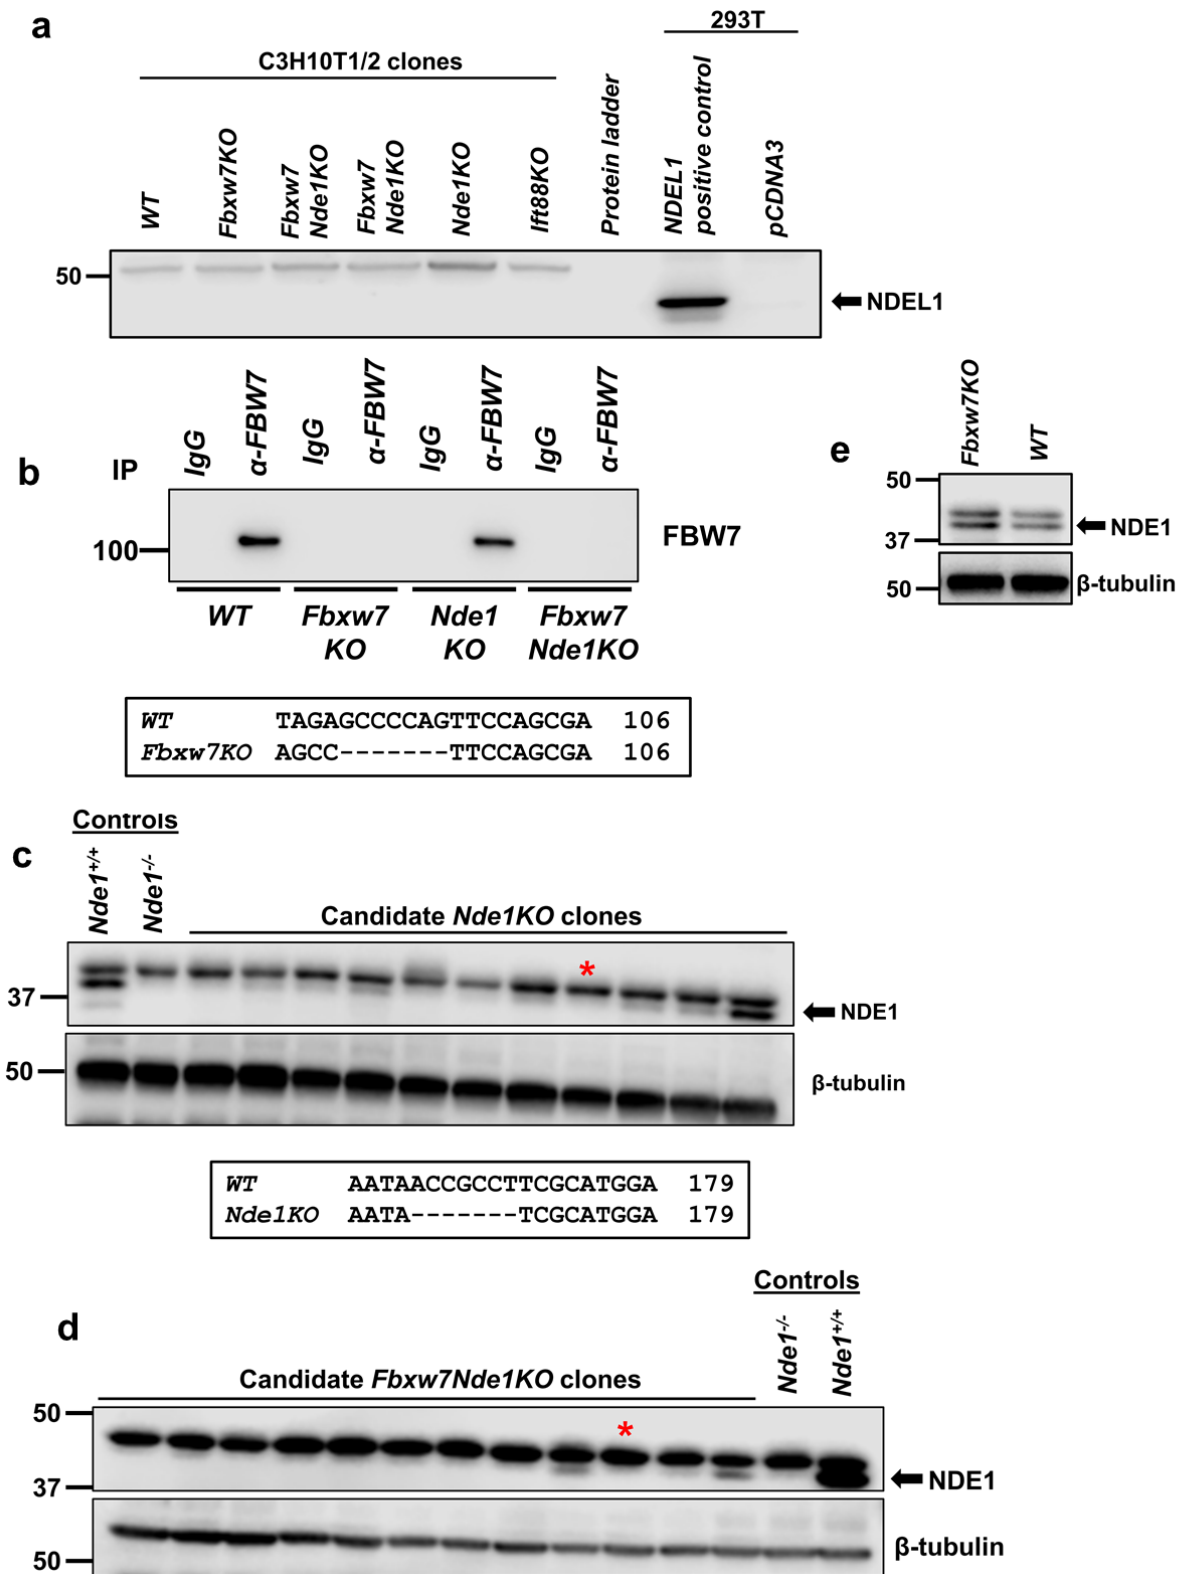

**Supplementary Figure 5. Expression of endogenous NDEL1 and validation of CRISPR/Cas9-mediated gene editing of indicated target genes in C3H10T1/2 cells.**

**a)** Absence of NDEL1 expression in C3H10T1/2 clones. NDEL1 overexpression in HEK293T cells was used as a positive control.

**b)** Immunoprecipitation of endogenous FBW7 in wild type, *Fbxw7KO*, *Nde1KO* and *Fbxw7Nde1KO* C3H10T1/2 clones generated via CRISPR-Cas9 gene editing using *Fbxw7*- or *Nde1*- specific sgRNAs. Bottom: Sanger sequencing of exon 1 of mouse *Fbxw7* in *Fbxw7KO* C3H10T1/2 cells revealed a deletion around the Cas9 cleavage site.

**c)** Expression levels of endogenous NDE1 in various candidate *Nde1KO* clones. *Nde1<sup>+/+</sup>* and *Nde1<sup>-/-</sup>* MEF controls are shown in lanes 1 and 2, respectively, indicating that the lower band of the doublets is NDE1. Bottom: Sanger sequencing of the clone indicated with the red asterisk revealed a deletion around the Cas9 cleavage site.

**d)** Expression levels of endogenous NDE1 in various candidate *Fbxw7Nde1KO* clones. Previously generated *Fbxw7KO* C3H10T1/2 clone was transfected with *Nde1*- specific sgRNA to generate double *Fbxw7Nde1KO* C3H10T1/2 clones. *Nde1<sup>+/+</sup>* and *Nde1<sup>-/-</sup>* MEF controls are shown in lanes 13 and 14, respectively, indicating that the lower band in the doublets is NDE1.

**e)** Expression levels of endogenous NDE1 in the *Fbxw7KO* C3H10T1/2 clone under 24h serum starvation conditions. Arrow indicates the band corresponding to NDE1.

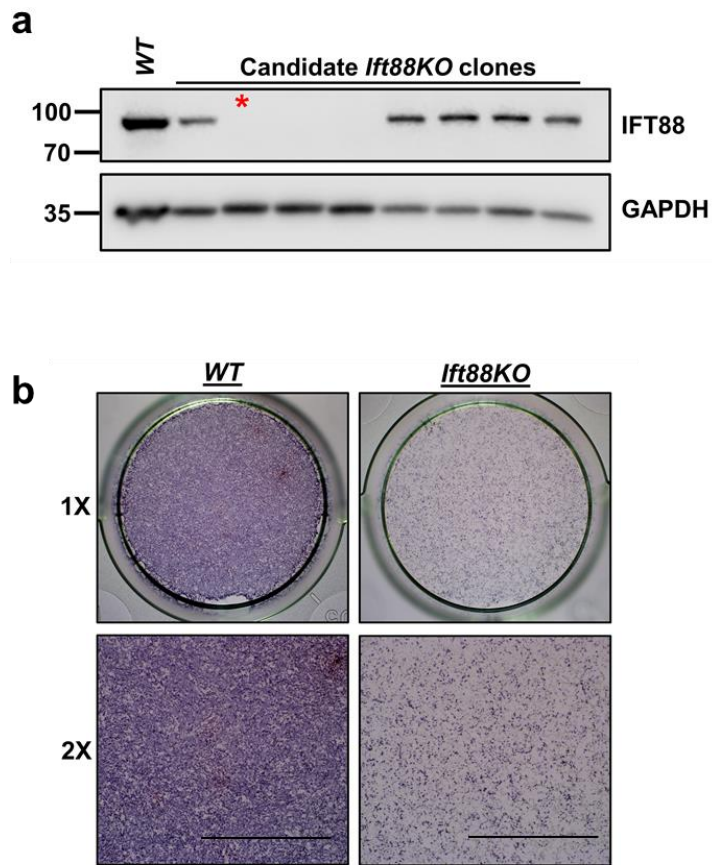

**Supplementary Figure 6. Disruption of primary cilia compromises osteoblast differentiation in C3H10T1/2 cells.**

**a)** Generation of *Ift88*KO C3H10T1/2 via CRISPR-Cas9 gene editing. Expression levels of endogenous IFT88. Red asterisk indicates null clone selected.

**b)** Wild type or the *Ift88*KO clone from (a) was induced via osteogenic medium and differentiation was analyzed via ALP staining. Images at 1x or 2x magnification were taken from 24-well plates. Well diameter: 16 mm. Scale bar: 5 mm.



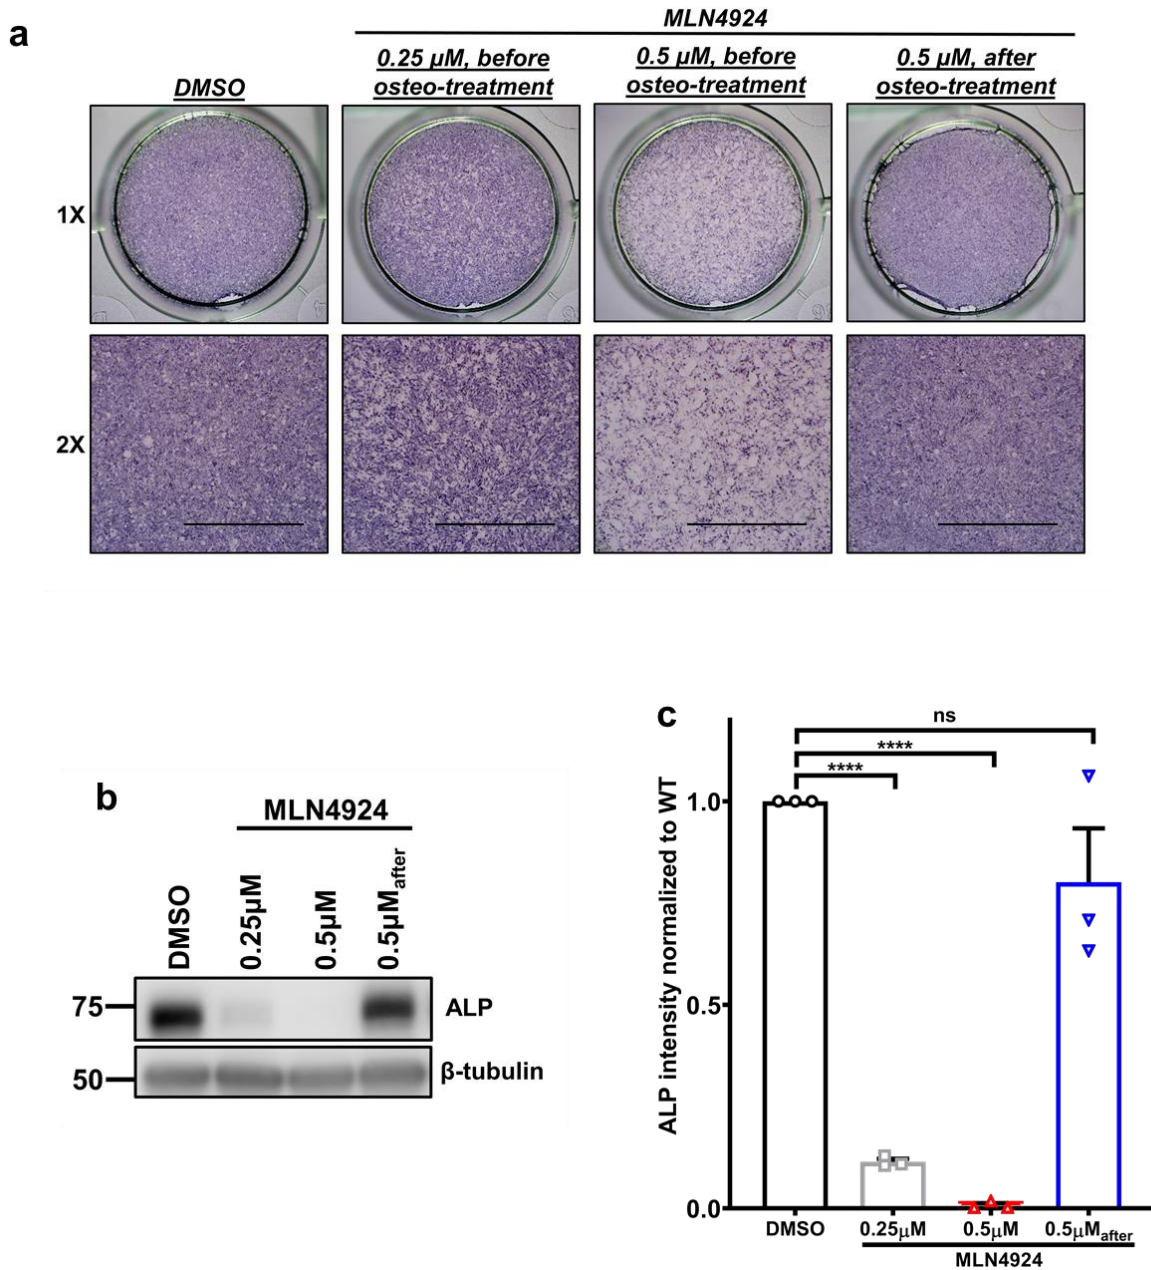

**Supplementary Figure 7. Inhibition of FBW7 by MLN4924 before osteogenic induction severely compromises osteoblast differentiation in C3H10T1/2 cells.**

**a)** ALP staining of wild type C3H10T1/2 cells after the indicated treatments. Images at 1x or 2x magnification were taken from 24-well plates. Well diameter: 16 mm. Scale bar: 5 mm.

**b,c)** Expression levels of ALP in wild type C3H10T1/2 cells after the indicated treatments (b) and summary data (c). Data are presented as means  $\pm$  SEM. One-way ANOVA with Dunnett's multiple comparisons test, \*\*\*\* $p < 0.0001$ .



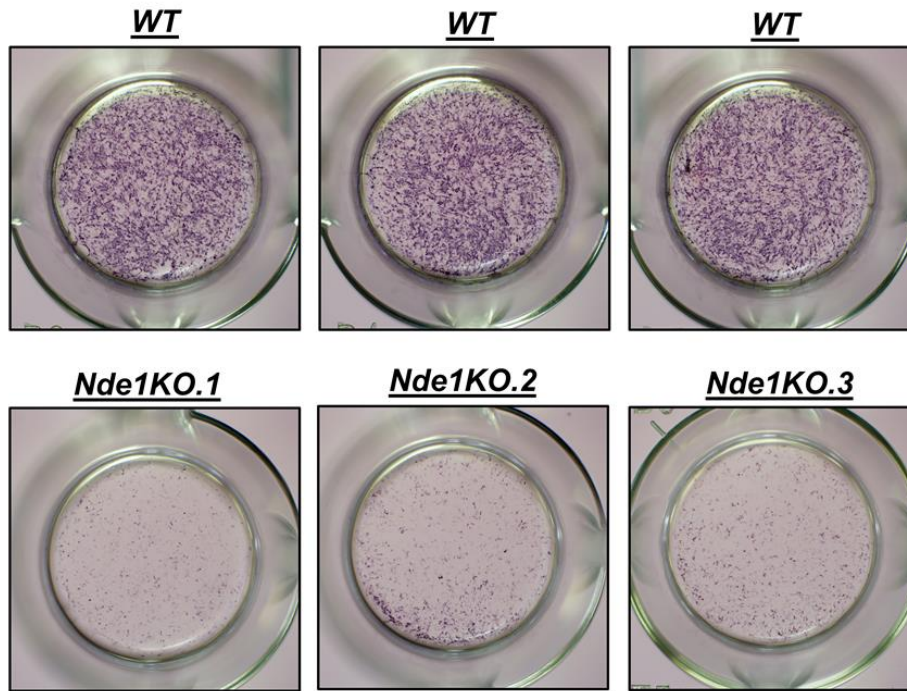

|                 |                        |     |
|-----------------|------------------------|-----|
| <i>WT</i>       | AATAACCGCCTTCGCATGGA   | 179 |
| <i>Nde1KO.1</i> | AATAACCGCCTTTTCGCATGGA | 179 |
| <i>Nde1KO.2</i> | AATAACCGCCTTTTCNCATGGA | 179 |
| <i>Nde1KO.3</i> | AATAACCGCCTC-TCATGNA   | 179 |

**Supplementary Figure 8. Suppressed osteoblast differentiation in multiple *Nde1KO* C3H10T1/2 clones.**

ALP staining of multiple *Nde1KO* C3H10T1/2 clones, compared to wild type. Bottom: Sanger sequencing of the clones revealed indels around the Cas9 cleavage site. Images were taken from 24-well plates. Well diameter: 16 mm.

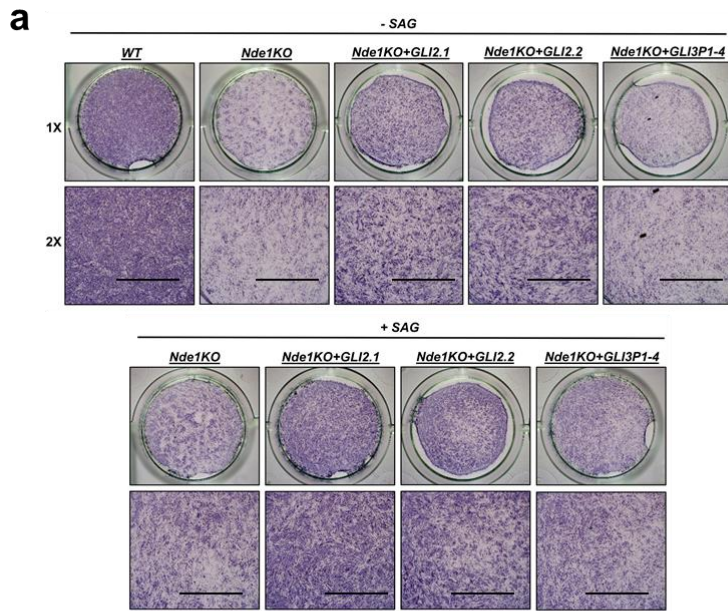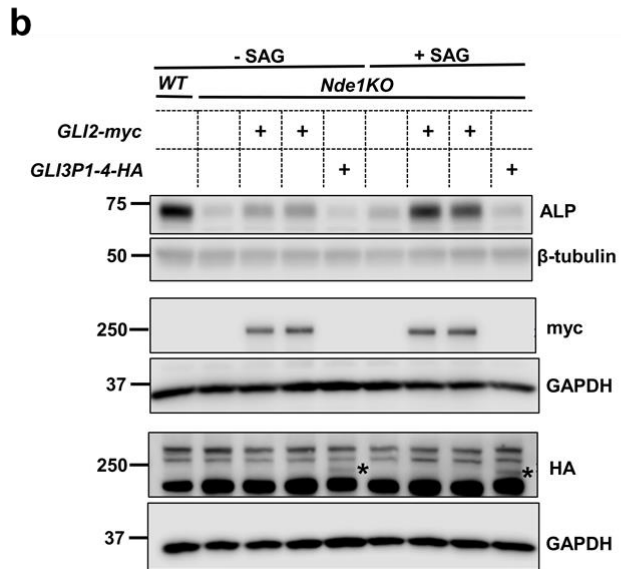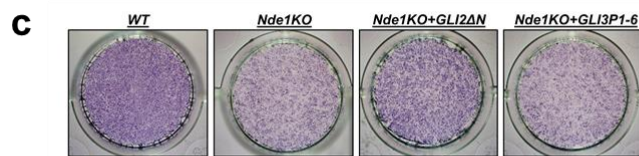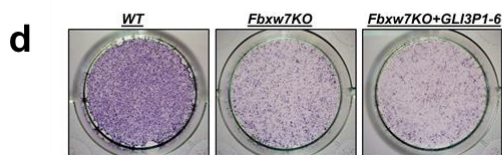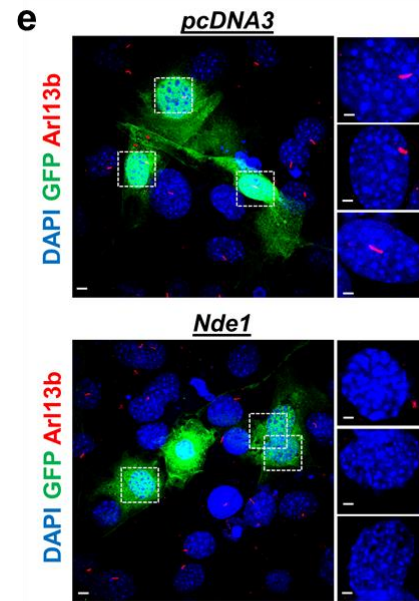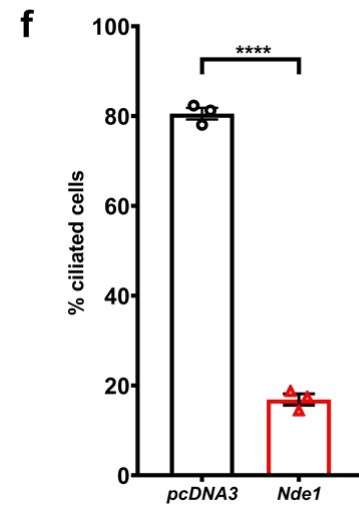

**Supplementary Figure 9. Modulation of the differentiation of *Nde1-KO* C3H10T1/2 cells by GLI2 and GLI3 and effect of NDE1 on cilium incidence of wild type C3H10T1/2 cells.**

**a,b)** Representative ALP staining (a) and protein expression levels (b) of wild type and *Nde1KO* C3H10T1/2 cells transfected with the indicated constructs and treated with or without Smoothened agonist (SAG). Images at 1x or 2x magnification were taken from 24-well plates. Well diameter: 16 mm. Scale bar: 5 mm. (a) Asterisks indicate GLI3P1-4-HA band.

**c)** Representative ALP staining of wild type and *Nde1KO* C3H10T1/2 cells transfected with the indicated constructs. Well diameter: 16 mm.

**d)** Representative ALP staining of wild type and *Fbxw7KO* C3H10T1/2 cells transfected with the indicated constructs. Well diameter: 16 mm.

**e,f)** Representative images of wild type C3H10T1/2 cells transfected with GFP and the indicated constructs, and serum starved for 24h (e). Scale bars: 5  $\mu$ m. Scale bars in insets: 2  $\mu$ m. Percent of ciliated cells (f) (n=3 experiments) in (e). Data are presented as means  $\pm$  SEM. Student's t-test, \*\*\*\*p < 0.0001.

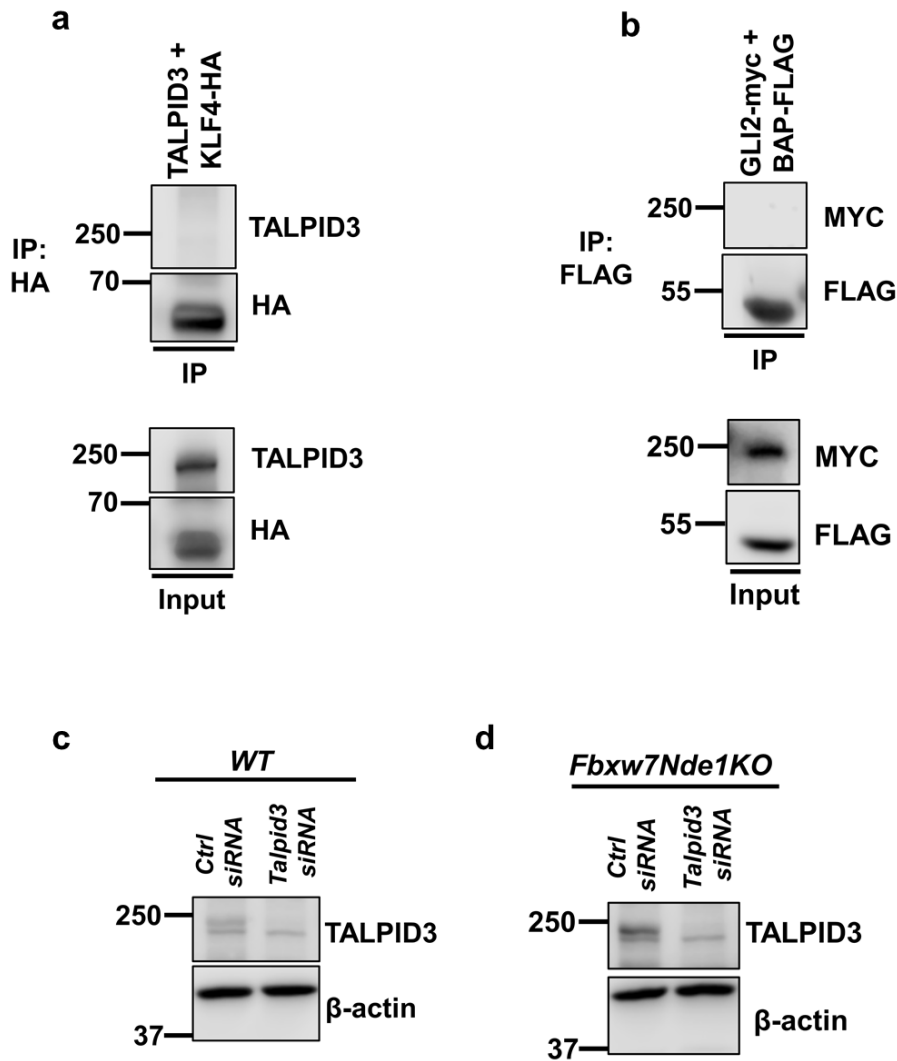

**Supplementary Figure 10. No interaction of proteins of interest (TALPID3 or GLI2) with negative controls (KLF4 or BAP) and validation of silencing efficiency of *Talpid3*-specific siRNA.**

**a)** No physical interaction of TALPID3 with HA-tagged KLF4 (KLF4-HA) in HEK293T cells.  
**b)** No physical interaction of GLI2-myc with FLAG-tagged bacterial alkaline phosphatase (BAP-FLAG) in HEK293T cells.  
**c,d)** Expression levels of TALPID3 in wild type (f) or *Fbxw7Nde1KO* (g) C3H10T1/2 cells transfected with a *Talpid3* construct and mock or *Talpid3* specific siRNA

**Suppl. Fig 5a**

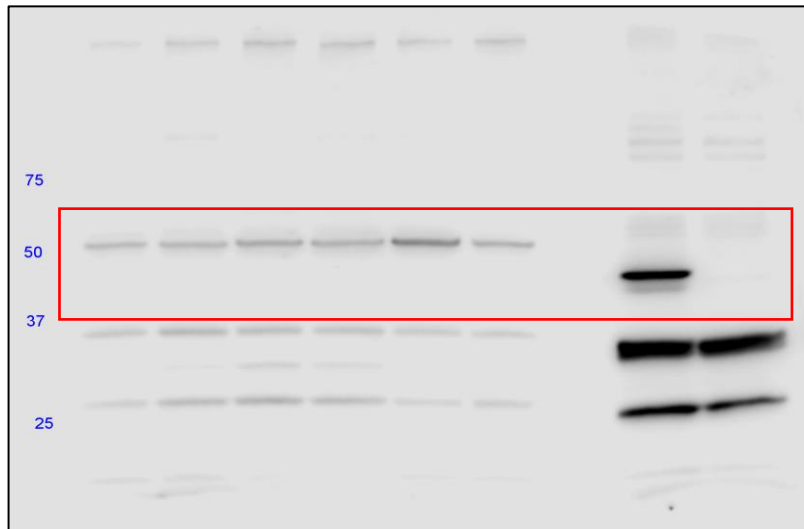

**Suppl. Fig 5b**

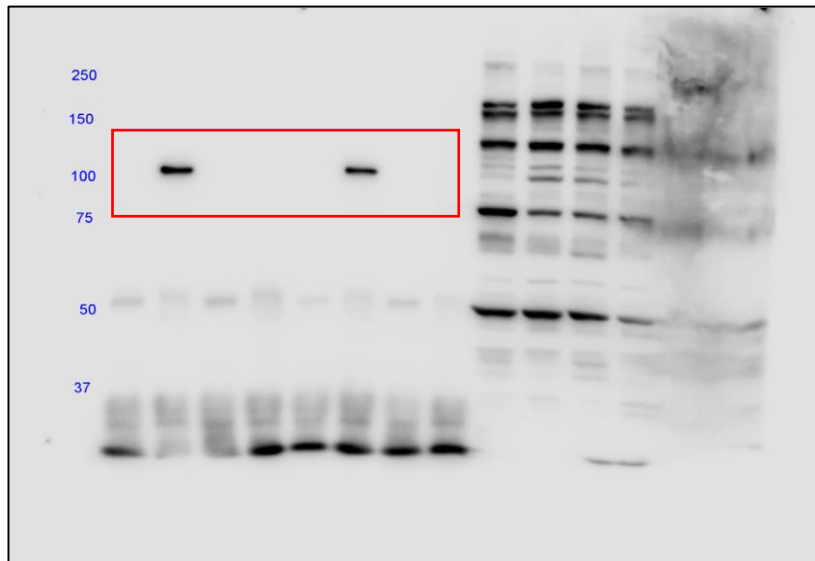

**Suppl. Fig 5c**

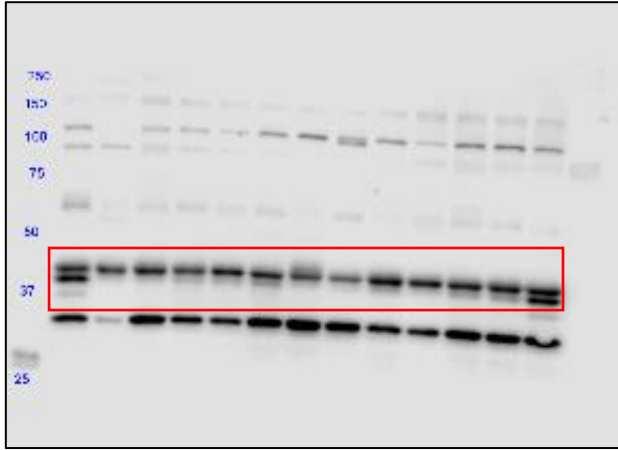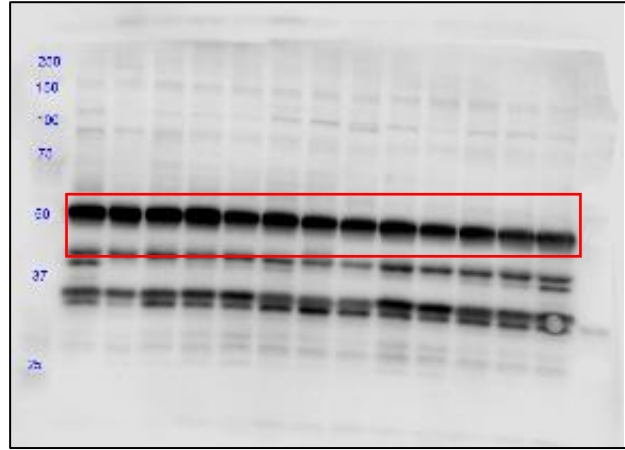

**Suppl. Fig 5d**

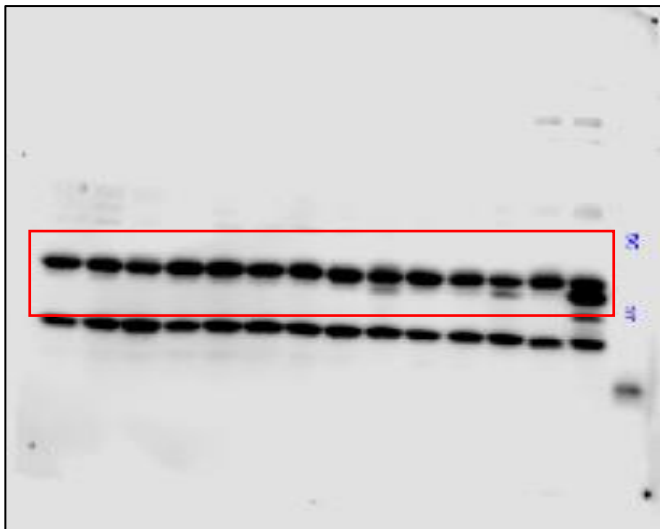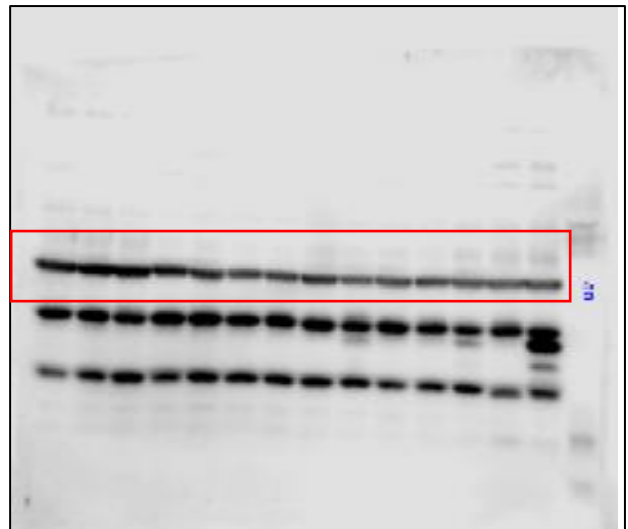



**Suppl. Fig 5e**

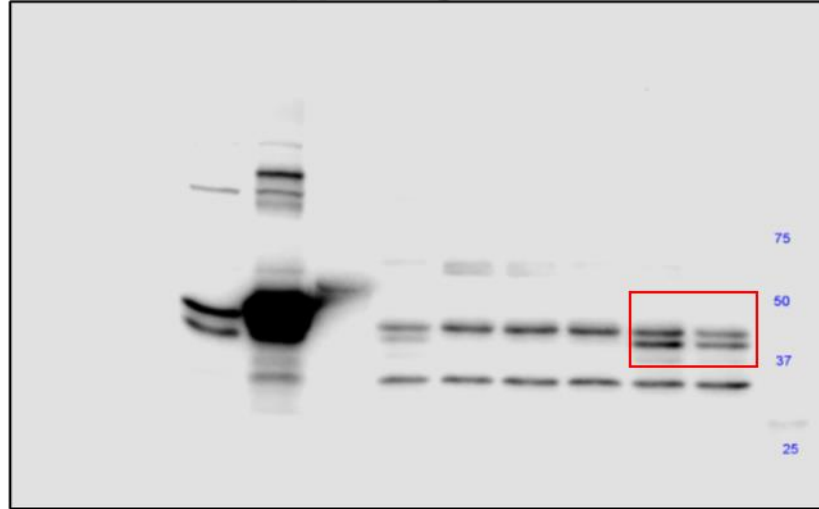

**Suppl. Fig 5e**

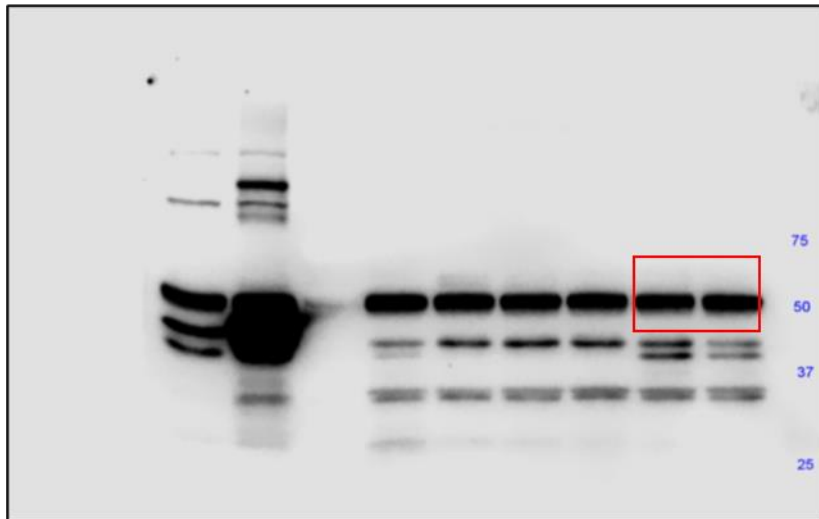

**Suppl. Fig 10c**

**Suppl. Fig 10d**

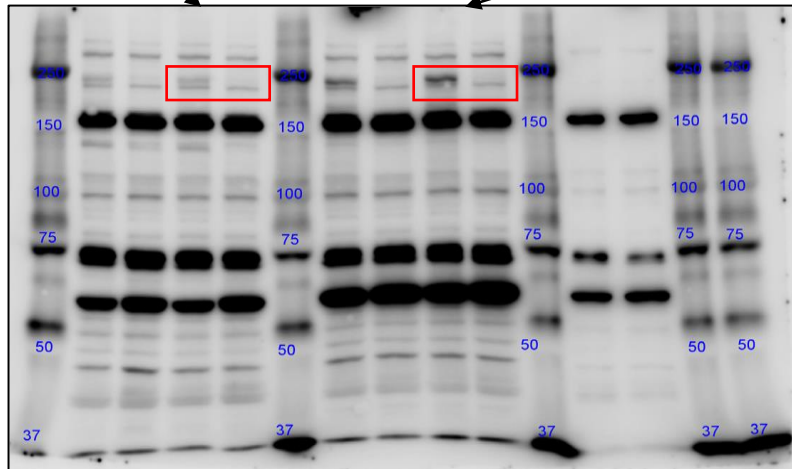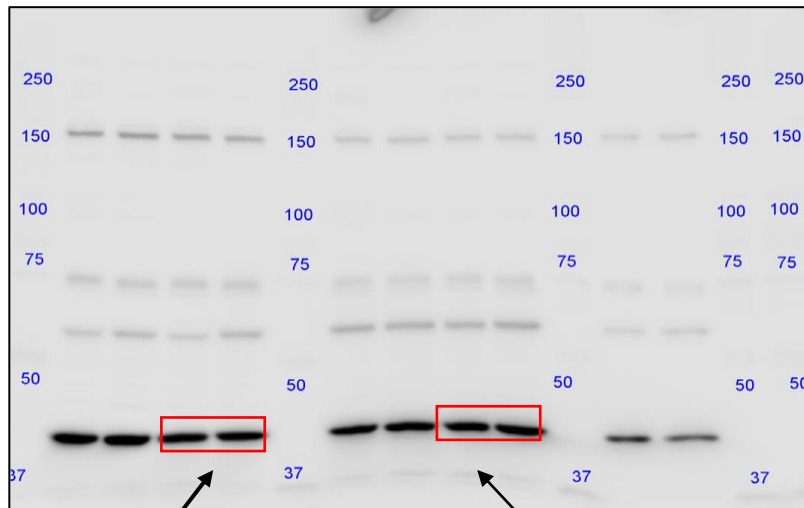

**Suppl. Fig 10c**

**Suppl. Fig 10d**
