# Supplementary material for: FBW7 couples structural integrity with functional output of primary cilia
Source: PubMed Central journal article supplement (PMC8438042; doi:10.1038/s42003-021-02504-4), 2021-09-13
Supplement: 42003_2021_2504_MOESM3_ESM.pdf [file 42003_2021_2504_MOESM3_ESM.pdf]

## Description of Additional Supplementary Files

File Name: Supplementary Data 1

Description: Source Data
